# Supplementary material
Source: PubMed Central journal article supplement (PMC5373067)
Supplement: supp_pp.17.00062_PP2017-00062DR1_Supplemental_Material.pdf [file supp_pp.17.00062_PP2017-00062DR1_Supplemental_Material.pdf]

## **Supplemental data**

### **Photosynthetic trichomes contain a specific Rubisco with a modified pH-dependent activity**

Raphaëlle Laterre, Mathieu Pottier, Claire Remacle and Marc Boutry

**Supplemental Table S1 – MS-MS identification of the 49 most abundant trichome-specific protein spots.**

| <b>Spot<sup>1</sup></b>                | <b>EST accession<sup>2</sup></b> | <b>Corresponding protein name</b>                     |
|----------------------------------------|----------------------------------|-------------------------------------------------------|
| <b>Metabolism</b>                      |                                  |                                                       |
| 20                                     | FG175097                         | Glutamine synthetase                                  |
| 4                                      | EB432526                         | Nucleoside diphosphate kinase                         |
| 24                                     | FG194360                         | 3-isopropylmalate dehydrogenase large subunit         |
| 22                                     | FG194360                         | 3-isopropylmalate dehydrogenase large subunit         |
| 26                                     | FG139607                         | D-cysteine desulfhydrase                              |
| 42                                     | DV157962                         | Rubisco small subunit                                 |
| 15                                     | EB679897                         | NAD-dependent dehydrogenase                           |
| 43                                     | EB679897                         | NAD-dependent dehydrogenase                           |
| <b>Energy</b>                          |                                  |                                                       |
| 27                                     | DV162381                         | Phosphoglycerate kinase                               |
| 33g                                    | FG133688                         | ATP synthase $\beta$ subunit                          |
| 33d                                    | FG135901                         | ATP synthase $\beta$ subunit                          |
| 3d                                     | FS414373                         | ATP synthase d subunit                                |
| 30                                     | EB680336                         | Aspartate aminotransferase                            |
| 13                                     | FG198580                         | Light harvesting chlorophyll a/b-binding protein      |
| <b>Protein destination and storage</b> |                                  |                                                       |
| 34d                                    | DW000222                         | Chaperonin-60 beta subunit                            |
| <b>Disease/defense</b>                 |                                  |                                                       |
| 1                                      | FS387666                         | Putative PR-10 type pathogenesis-related protein      |
| 2                                      | FS387666                         | Putative PR-10 type pathogenesis-related protein      |
| 3g                                     | FS387666                         | Putative PR-10 type pathogenesis-related protein      |
| 6                                      | FS387666                         | Putative PR-10 type pathogenesis-related protein      |
| 32                                     | AM817165                         | Pathogenesis-related protein                          |
| 9                                      | FG194579                         | Thioredoxin peroxidase                                |
| 10g                                    | FG194579                         | Thioredoxin peroxidase                                |
| 5                                      | FS429935                         | Thioredoxin peroxidase                                |
| 19                                     | EB677336                         | Fe-superoxide dismutase                               |
| 18                                     | EB677336                         | Fe-superoxide dismutase                               |
| 8                                      | EH622457                         | Superoxide dismutase                                  |
| 7                                      | EH624278                         | Glutathione peroxidase                                |
| 17                                     | FS374016                         | Glutathione S-transferase                             |
| 16                                     | FS374016                         | Glutathione S-transferase                             |
| 14b                                    | FS411447                         | Glutathione S-transferase                             |
| 14h                                    | FS411447                         | Glutathione S-transferase                             |
| 44                                     | EB447814                         | Glutathione S-transferase                             |
| 10d                                    | EB440026                         | Peroxiredoxin                                         |
| 11                                     | EB440026                         | Peroxiredoxin                                         |
| <b>Secondary metabolism</b>            |                                  |                                                       |
| 34g                                    | FG187107                         | Cembratrienol synthase 2b                             |
| 35                                     | FG187107                         | Cembratrienol synthase 2b                             |
| 36                                     | FG187107                         | Cembratrienol synthase 2b                             |
| 37                                     | FG187107                         | Cembratrienol synthase 2b                             |
| 28                                     | EH615865                         | Chalcone synthase                                     |
| 12                                     | EB426860                         | Chalcone isomerase                                    |
| 25                                     | FG175910                         | 1-deoxy-D-xylulose-5-phosphate reductoisomerase       |
| 23                                     | DV998901                         | 1-hydroxy-2-methyl-butenyl 4-diphosphate reductase    |
| 21                                     | FG187212                         | 1-hydroxy-2-methyl-butenyl 4-diphosphate reductase    |
| 38                                     | FG175170                         | (E)-4-hydroxy-3-methylbut-2-enyl diphosphate synthase |
| 39                                     | FG149054                         | (E)-4-hydroxy-3-methylbut-2-enyl diphosphate synthase |
| 40                                     | FG149054                         | (E)-4-hydroxy-3-methylbut-2-enyl diphosphate synthase |
| 41                                     | FG149054                         | (E)-4-hydroxy-3-methylbut-2-enyl diphosphate synthase |
| <b>Unknown</b>                         |                                  |                                                       |
| 29                                     | AM816756                         | No identification                                     |
| 31                                     | AM816756                         | No identification                                     |

<sup>1</sup>Numbering corresponds to that of Supplemental Fig 2. <sup>2</sup>Closest EST from the translated *N. tabacum* NCBI EST database

**Supplemental Table S2 – List of the protein sequences used for the phylogenetic analysis of the RbcS.** A, a protein BLAST search was performed (5 May 2015) using the Nt-RbcS-T mature protein sequence as a query. All of the proteins displaying a score higher than 200 are listed. Although the rice Rubisco small subunit, OsRbcS1 displays a BLAST score lower than the 200 threshold, its sequence was added to this analysis since its corresponding gene also exhibits a specific expression pattern (Morita *et al.*, 2014). Because, no sequence from C4 plants was obtained through the BLAST analysis, the two RbcS sequences of *Zea mays*, a C4 plant, were also included. The “Secretory organs” column mentions whether glandular trichomes (GT), trichomes without more information (T) secretory cavities (SC), nectaries (N) or colleters (C) have been reported for each species. B, for each species listed in A, the RbcS protein showing the highest identity with the protein listed in A was retrieved. In addition, all of the RbcS sequences from *Arabidopsis* were listed.

| Abbreviation        | Accession number (NCBI) | Species                          | Secretory organs | References <sup>1</sup> |
|---------------------|-------------------------|----------------------------------|------------------|-------------------------|
| <b>A. Cluster T</b> |                         |                                  |                  |                         |
| NtRbcS-t            | DV157962.1              | <i>Nicotiana tabacum</i>         | GT               | 1                       |
| Nsy-t               | XP_009794031.1          | <i>Nicotiana sylvestris</i>      | GT               | 1                       |
| Nto-t               | XP_009608851.1          | <i>Nicotiana tomentosiformis</i> | GT               | 1                       |
| Stu-t               | XP_006344531.1          | <i>Solanum tuberosum</i>         | GT               | 2                       |
| Sly-t               | XP_004243079.1          | <i>Solanum lycopersicum</i>      | GT               | 3                       |
| Egr-t               | XP_010046977.1          | <i>Eucalyptus grandis</i>        | SC               | 4                       |
| Lja-t1              | AFK34410.1              | <i>Lotus japonicus</i>           | T                | 5                       |
| Cca-t               | CDP02988.1              | <i>Coffea canephora</i>          | GC               | 6                       |
| Egu-t               | EYU37322.1              | <i>Erythranthe guttata</i>       | T                | 7                       |
| Csi-t1              | KDO43856.1              | <i>Citrus sinensis</i>           | SC               | 8                       |
| Jcu-t1              | XP_012074043.1          | <i>Jatropha curcas</i>           | T                | 9                       |
| Ccl-t1              | XP_006453353.1          | <i>Citrus clementina</i>         | SC               | 8                       |
| Jcu-t2              | KDP36388.1              | <i>Jatropha curcas</i>           | T                | 9                       |
| Ccl-t2              | XP_006453352.1          | <i>Citrus clementina</i>         | SC               | 8                       |
| Csi-t2              | KDO43855.1              | <i>Citrus sinensis</i>           | SC               | 8                       |
| Lja-t2              | AFK37376.1              | <i>Lotus japonicus</i>           | T                | 5                       |
| Gra-t               | KJB20540.1              | <i>Gossypium raimondii</i>       | GT               | 10                      |
| Gar-t               | KHG02980.1              | <i>Gossypium arboreum</i>        | GT               | 10                      |
| Atr-t               | XP_006856657.1          | <i>Amborella trichopoda</i>      | T                | 11                      |
| Peu-t               | XP_011043951.1          | <i>Populus euphratica</i>        | GT               | 12                      |
| Ptr-t               | ABK96070.1              | <i>Populus trichocarpa</i>       | GT               | 12                      |
| Vvi-t               | XP_002270117.1          | <i>Vitis vinifera</i>            | GT               | 13                      |
| Sin-t               | XP_011069924.1          | <i>Sesamum indicum</i>           | GT               | 14                      |
| Ppe-t               | XP_007223576.1          | <i>Prunus persica</i>            | C                | 15                      |
| Mno-t               | XP_010094223.1          | <i>Morus notabilis</i>           | GT               | 16                      |
| Fve-t               | XP_004296442.1          | <i>Fragaria vesca</i>            | GT               | 17                      |
| Tca-t               | XP_007014245.1          | <i>Theobroma cacao</i>           | GT               | 18                      |
| Pmu-t               | XP_008223772.1          | <i>Prunus mume</i>               | C                | 15                      |
| Pbr-t               | XP_009336182.1          | <i>Pyrus bretschneideri</i>      | N                | 19                      |
| Gso-t               | KHN22693.1              | <i>Glycine soja</i>              | GT               | 20                      |
| Nnu-t               | XP_010275523.1          | <i>Nelumbo nucifera</i>          | GT               | 21                      |
| Mtr-t               | XP_003610095.1          | <i>Medicago truncatula</i>       | GT               | 22                      |
| Gma-t               | NP_001235868.1          | <i>Glycine max</i>               | GT               | 23                      |
| Pda-t               | XP_008803597.1          | <i>Phoenix dactylifera</i>       | T                | 24                      |
| Egi-t               | XP_010914155.1          | <i>Elaeis guineensis</i>         | T                | 25                      |
| Tha-t               | XP_010526347.1          | <i>Tarenaya hassleriana</i>      | GT               | 26                      |
| OsRbcS1             | BAD38596.1              | <i>Oryza sativa</i>              | -                | 27                      |
| <b>B. Cluster M</b> |                         |                                  |                  |                         |
| Nta                 | CAA26208.1              | <i>Nicotiana tabacum</i>         |                  |                         |
| Nsy                 | P22433.1                | <i>Nicotiana sylvestris</i>      |                  |                         |
| Nto                 | XP_009625434.1          | <i>Nicotiana tomentosiformis</i> |                  |                         |
| Stu                 | ABY21254.1              | <i>Solanum tuberosum</i>         |                  |                         |
| Sly                 | BAA01888.1              | <i>Solanum lycopersicum</i>      |                  |                         |
| Egr                 | XP_010044264.1          | <i>Eucalyptus grandis</i>        |                  |                         |

---

|         |                |                             |
|---------|----------------|-----------------------------|
| Lja-1   | AFK45650.1     | <i>Lotus japonicus</i>      |
| Cca     | CBY05833.1     | <i>Coffea canephora</i>     |
| Egu     | EYU38174.1     | <i>Erythranthe guttata</i>  |
| Csi     | XP_006482254.1 | <i>Citrus sinensis</i>      |
| Jcu     | ADB85091.1     | <i>Jatropha curcas</i>      |
| Ccl     | XP_006430779.1 | <i>Citrus clementina</i>    |
| Gra     | AFS41724.1     | <i>Gossypium raimondii</i>  |
| Gar     | AFS41722.1     | <i>Gossypium arboreum</i>   |
| Atr     | XP_006842277.2 | <i>Amborella trichopoda</i> |
| Peu     | XP_011035062.1 | <i>Populus euphratica</i>   |
| Ptr     | XP_002305162.2 | <i>Populus trichocarpa</i>  |
| Vvi     | XP_002276967.1 | <i>Vitis vinifera</i>       |
| Sin     | XP_011099669.1 | <i>Sesamum indicum</i>      |
| Ppe     | XP_007215051.1 | <i>Prunus persica</i>       |
| Mno     | XP_010103758.1 | <i>Morus notabilis</i>      |
| Fve     | XP_004303137.1 | <i>Fragaria vesca</i>       |
| Tca     | XP_007033270.1 | <i>Theobroma cacao</i>      |
| Pmu     | XP_008244506.1 | <i>Prunus mume</i>          |
| Pbr     | XP_009357812.1 | <i>Pyrus bretschneideri</i> |
| Gso     | KHN47663.1     | <i>Glycine soja</i>         |
| Nnu     | XP_010263805.1 | <i>Nelumbo nucifera</i>     |
| Mtr     | XP_003618735.1 | <i>Medicago truncatula</i>  |
| Gma     | AAG24884.1     | <i>Glycine max</i>          |
| Pda     | XP_008797838.1 | <i>Phoenix dactylifera</i>  |
| Egi     | XP_010916368.1 | <i>Elaeis guineensis</i>    |
| Tha     | XP_010521010.1 | <i>Tarenaya hassleriana</i> |
| OsRbcS2 | BAT16666.1     | <i>Oryza sativa</i>         |
| OsRbcS3 | BAT16784.1     | <i>Oryza sativa</i>         |
| OsRbcS4 | BAT16793.1     | <i>Oryza sativa</i>         |
| OsRbcS5 | BAT16789.1     | <i>Oryza sativa</i>         |
| Zma1    | NP_001105294   | <i>Zea mays</i>             |
| Zma2    | NP_001146043   | <i>Zea mays</i>             |
| Ath-1   | AAD10655.1     | <i>Arabidopsis thaliana</i> |
| Ath-2   | CAA32702.1     | <i>Arabidopsis thaliana</i> |
| Ath-3   | CAA32700.1     | <i>Arabidopsis thaliana</i> |
| Ath-4   | CAA31948.1     | <i>Arabidopsis thaliana</i> |

---

## <sup>1</sup>References

1. Sierró N, Battey JND, Ouadi S, Bovet L, Goepfert S, Bakaher N, Peitsch MC, Ivanov NV (2013) Reference genomes and transcriptomes of *Nicotiana sylvestris* and *Nicotiana tomentosiformis*. *Genome Biol* 14: R60
2. Lyshede OB (1980) The ultrastructure of the glandular trichomes of *Solanum tuberosum*. *Annals Bot* 46: 519-526
3. Bergau N, Bennewitz S, Syrowatka F, Hause G and Tissier A (2015) The development of type VI glandular trichomes in the cultivated tomato *Solanum lycopersicum* and a related wild species *S. habrochaites*. *BMC Plant Biology* 15:289
4. Goodger JQD, Heskes AM, Mitchell MC, King DJ, Neilson EH, Woodrow IE (2010) Isolation of intact sub-dermal secretory cavities from *Eucalyptus* (2010) *Plant Methods* 6: 20
5. Stenglein SA, Colares MN, Arambarri AM, Novoa MC, Vizcaino CE, Katinas L (2003) Leaf epidermal microcharacters of the Old World species of *Lotus* (Leguminosae: Loteae) and their systematic significance. *Aust J Bot* 51: 459-469
6. Mayer JLS, Carmello-Guerreiro SM, Mazzafera P (2013) A functional role for the colleter cells of coffee flowers. *AoB Plants* 5: plt029
7. Nesom GL (2013) Two new species of *Erythranthe* Sect. *Mimulosma* (Phrymaceae) from California. *Phytoneuron* 43: 1-10

8. Bennici A, Tani C (2004) Anatomical and ultrastructural study of the secretory cavity development of *Citrus sinensis* and *Citrus limon*: evaluation of schizolysigenous ontogeny. *Flora* 199: 464-475
9. Rai K, Tiwari E (2012) Epidermal studies in identification of *Jatropha* species. *IOSR J Pharmacy Biol Sci* 2: 41-51
10. Turley RB, Vaughn KC (2012) Differential expression of trichomes on the leaves of upland cotton (*Gossipium hirsutum* L.). *J Cotton Sci* 16:53-71
11. Endress PK, Igersheim A (2000) The reproductive structures of the basal angiosperm *Amborella trichopoda* (Amborellaceae). *Int J Plant Sci* 161: S237-S248
12. Trelease W (1881) The foliar nectar glands of *Populus*. *Bot Gaz* 6: 284-290
13. Ma ZY, Wen J, Ickert-bond SM, Chen LQ, Liu XQ (2016) Morphology, structure, and ontogeny of trichomes of the grape genus (*Vitis*, Vitaceae) *Frontiers Plant Sci* 7: 704
14. Zhigila DA, Sawa FBJ, Abdul SD (2015) Systematic significance and pharmaceutical potentials of trichomes in accessions of *Sesamum indicum* L. *J Med Plants Res* 9: 385-394
15. Chin SW, Lutz S, Wen J, Potter D (2013) The bitter and the sweet: inference of homology and evolution of leaf glands in *Prunus* (Rosaceae) through anatomy, micromorphology, and ancestral-character state reconstruction. *Int J Plant Sci* 174: 27-46
16. Singhal BK, Baqual MF, Khan MA, Bindroo BB, Dhar A (2010) Leaf surface scanning electron microscopy of 16 mulberry genotypes (*Morus* spp.) with respect to their feeding value in silkworm *Bombyx mori* L.) rearing. *Chil J Agric Res* 70: 191-198
17. Figueiredo AST, Resende JTV, Morales RGF, Gonçalves APS, Da Silva PR (2013) The role of glandular and non-glandular trichomes in the negative interactions between strawberry cultivar and spider mite. *Arthropod-Plant Interactions* 7: 53-58
18. Bailey BA, Strem MD, Wood D (2009) *Trichoderma* species form endophytic associations within *Theobroma cacao* trichomes. *Mycological Res* 113: 1365-1376
19. Qinggang XHC, Zhenghai H (1998) Developmental and anatomical studies of the floral nectaries in *Pyrus bretschneideri*. *J. Laiyang Agricultural College* 1998-01
20. Healy RA, Palmer RG, Horner HT (2009) Multicellular secretory trichome development on soybean and related *Glycine* gynoecea? *Int J Plant Sci* 170: 444-456
21. Hayes V, Schneider EL, Carlquist S (2000) Floral development of *Nelumbo nucifera* (Nelumbonaceae). *Int J Plant Sci* 161: S183-S191
22. Aziz N, Paiva NL, May GD, Dixon RA (2005) Transcriptome analysis of alfalfa glandular trichomes. *Planta* 221: 28-38
23. Franceschi VR, Giaquinta RT (1983) Glandular trichomes of soybean leaves: cytological differentiation from initiation through senescence. *Bot Gaz* 144: 175-184
24. Karakish EAK (2008) Studies in the leaf anatomy of some species of Phoenix (Family Araceae). Thesis. Umm Al-Qura University
25. Luis ZG, Bezerra KM, Scherwinski-Pereira JE (2010) Adaptability and leaf anatomical features in oil palm seedlings produced by embryo rescue and pre-germinated seeds. *Braz J Plant Physiol* 22: 209-215
26. Williams LAD, Vasques E, Reid W, Porter R, Kraus W (2003) Biological activities of an extract from *Cleome viscosa* L. (Capparaceae). *Naturwissenschaften* 90: 468-472
27. Li W, Wu J, Weng S, Zhang D, Zhang Y, Shi C (2010). Characterization and fine mapping of the glabrous leaf and hull mutants (gl1) in rice (*Oryza sativa* L.). *Plant Cell Rep* 29: 617-627

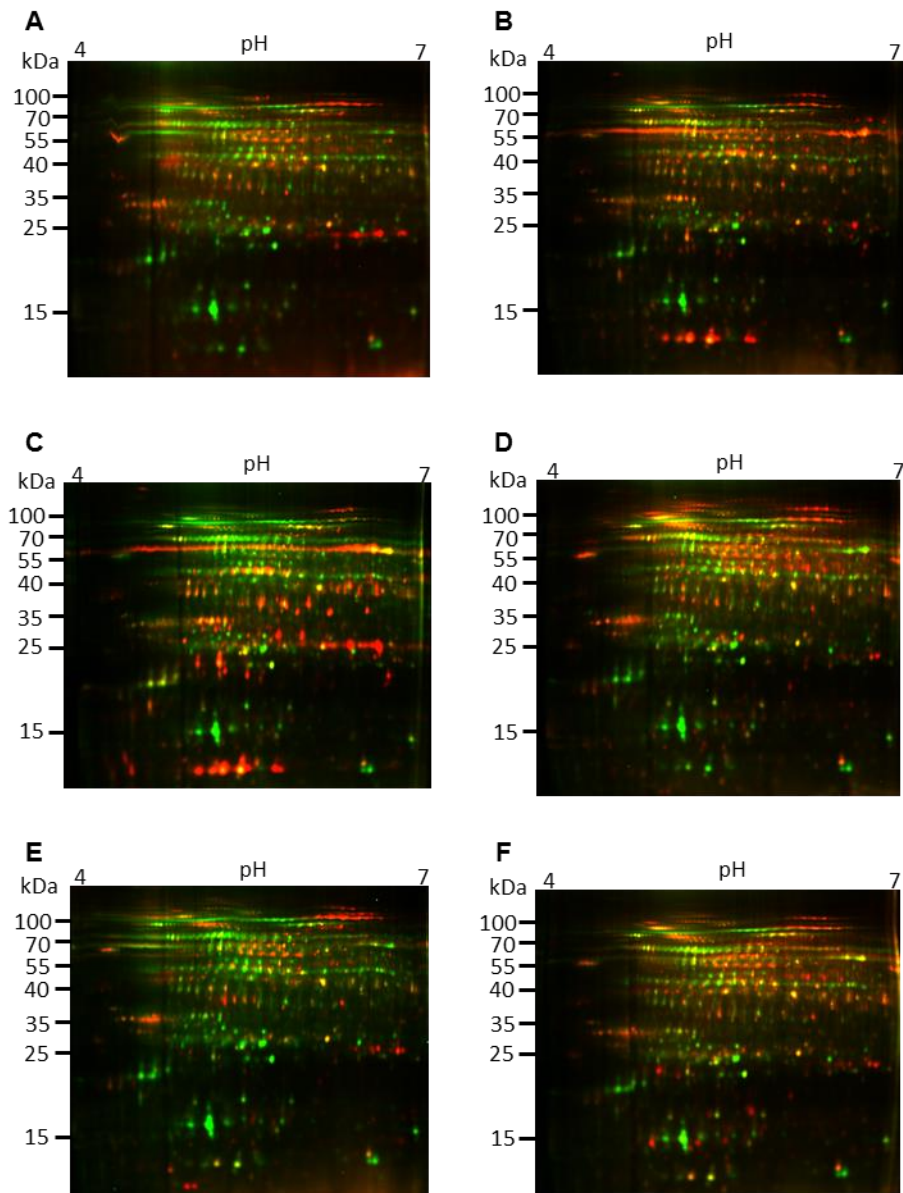

**Supplemental Figure S1** – 2D-DIGE of soluble proteins of tall glandular trichomes compared to other tissues. Proteins of tall glandular trichomes were compared to proteins from roots (A), germinating seeds (B), leaves (C), seed pods (D), stems (E), and flowers (F). Soluble proteins (20  $\mu\text{g}$ ) isolated from trichomes and other tissues were labeled with the Cy3 (green) and Cy5 (red) fluorescent dyes, respectively. As an internal control, 10  $\mu\text{g}$  of both compared protein samples were mixed and tagged with the Cy2 (blue) fluorescent dye (not shown).

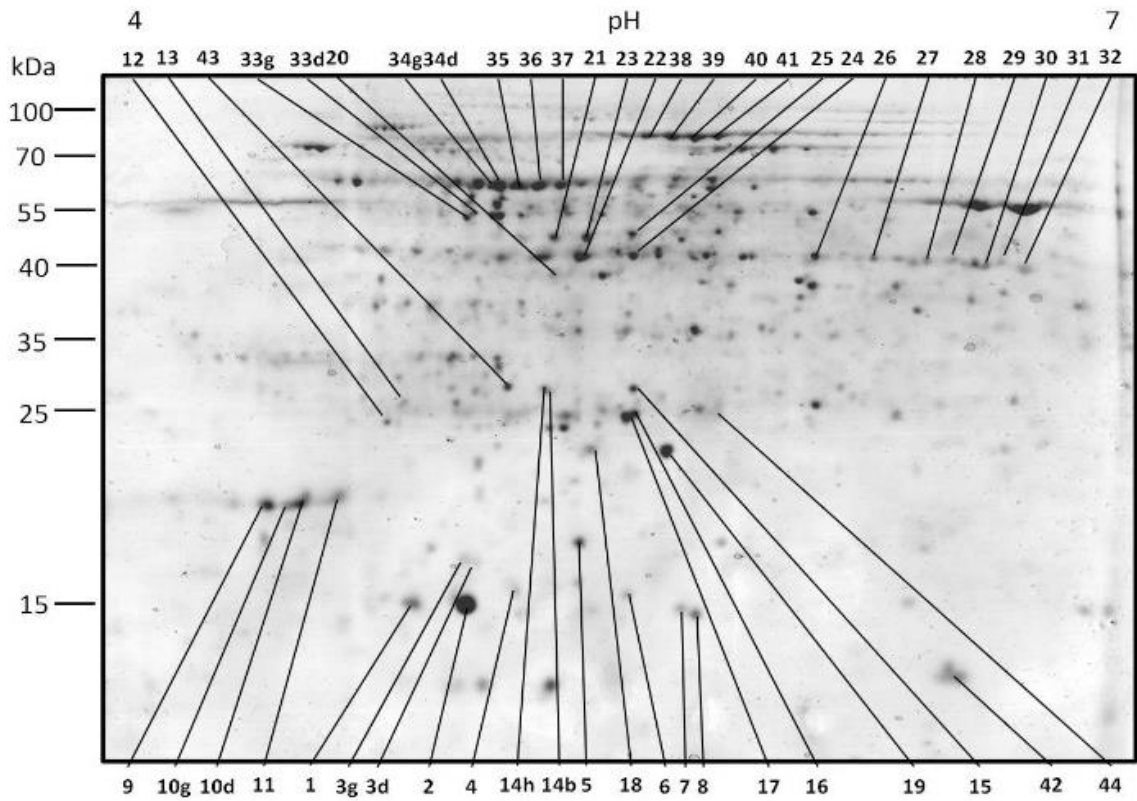

**Supplemental Figure S2** – Preparative 2-DE of soluble tall glandular trichome proteins. Proteins (500  $\mu\text{g}$ ) from tall glandular trichomes were analyzed by 2D gel electrophoresis and stained with colloidal blue. Spots that are numbered correspond to trichome-specific proteins and were analyzed by mass spectrometry. Their identification is given in Supplemental Table S1.

**A**

```
ATGATGACCTGGAACCCGATCGACAACAAGAAGTTCGAGACCCTGTCCTACCTGCCGCCGCTGTCCG
AGGACTCCATCGCCAAGGAGGTCGACTACATGATCCAGAAGGGCTGGATCCCGTGCCTGGAGTTCGA
CCAGGTCGGCTACGTCCGCCGCGAGAACTCCTCCATGCCGGGCTACTACGACGGCCGCTACTGGACC
CTGTGGAAGCTGCCGATGTTTCGGCTGCAACGACTCCTCCCAGGTCCTGAACGAGATCCAGGAGTGCA
AGAAGGCCTACCCGAACGCCTTCATCCGCTGCCTGGCCTTCGACAACGTCAAGCAGGTCCAGTGCAT
GGCCTTCCTGATCCAGAAGCCGGCCGCCCTAA
```

**B**

```
ATGATGGTCTGGCCGCCGATCAACAAGAAGAAGTACGAGACCCTGTCCTACCTGCCGGACCTGTCCC
AGGAGCAGCTGCTGTCCGAGGTCGAGTACCTGCTGAAGAACGGCTGGGTCCCGTGCCTGGAGTTCGA
GACCGAGCACGGCTTCGTCTACCGCGAGAACAACAAGTCCCGGGCTACTACGACGGCCGCTACTGG
ACCATGTGGAAGCTGCCGATGTTTCGGCTGCACCGACGCCACCCAGGTCCTGGCCGAGGTCGAGGAGG
CCAAGAAGGCCTACCCGCAGGCCTGGATCCGCATCATCGGCTTCGACAACGTCCGCCAGGTCCAGTG
CATCTCCTTCATCGCCTACAAGCCGGAGGGCTACTAA
```

**Supplemental Figure S3.** Synthetic coding sequences of NtRbcS-T and Nt-RbcS-M for expression in *Chlamydomonas*. The coding sequences for the mature small subunit NtRbcS-T (A) and NtRbcS-M (B) were optimized for expression in *Chlamydomonas*, and engineered to replace the plant Lys2 and Gln2, respectively, with the *Chlamydomonas* Met to facilitate transit-peptide processing. These sequences were used to exactly replace the *Chlamydomonas rbcS1* mature-protein coding sequence of pSS1-ITP (Genkov *et al.*, 2010) to generate the plasmids pSS1-NtRbcS-T and pSS1-NtRbcS-M.



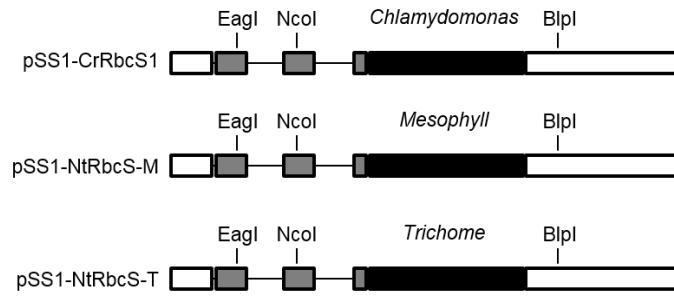

**Supplemental Figure S4.** Engineered plasmids containing the wild-type *Chlamydomonas rbcS1* gene (pSS1-CrRbcS1) and the *N. tabacum* mesophyll- and trichome-expressed *rbcS* cDNA sequences (pSS1-NtRbcS-M and pSS1-NtRbcS-T). The regions encoding the transit peptide and mature small subunit are shown as *gray* and *black boxes*, respectively, and introns are denoted by black lines. Introns are inserted into the transit peptide-encoding region. White boxes represent part of the plasmid. Figure adapted from Genkov *et al.*, 2010.

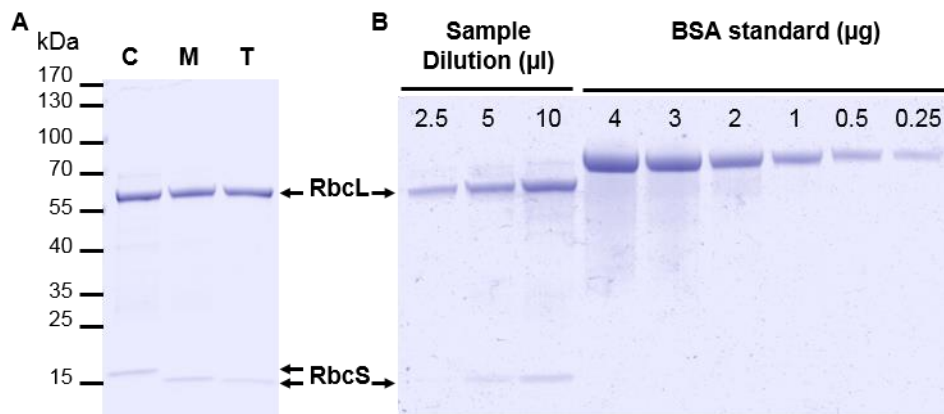

**Supplemental Figure S5.** Electrophoretic analysis of the purified Rubisco from *Chlamydomonas* transformants. A, Purified Rubisco (1  $\mu\text{g}$ ) from the strain expressing pSS1-CrRbcS1 (C), pSS1-NtRbcS-M (M), or pSS1-NtRbcS-T (T) were analyzed by SDS-PAGE and gel stained with Coomassie blue. B, Example of Rubisco quantification on gel. Increasing quantities of Rubisco and bovine serum albumin (BSA) used a standard were analyzed by SDS-PAGE. The gel pictures were then analyzed using ImageJ software.

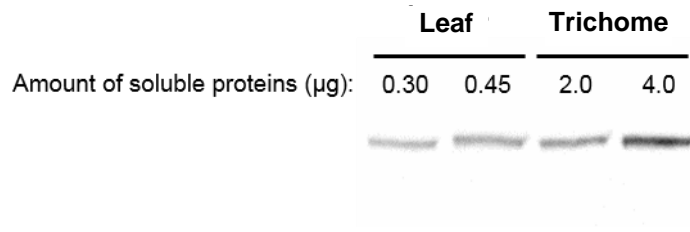

**Supplemental Figure S6.** Comparison of the Rubisco amount in trichome and leaf samples of *N. tabacum*. Soluble proteins (pool of the four biological repetitions of Fig. 6B) from leaves cleared of trichomes and from trichomes were analyzed by SDS-PAGE and western blotting using an anti-RbcL antibody. Relative quantification of the Rubisco determined in both samples using ImageJ software showed that trichome samples contains 4.5 times less Rubisco than leaf samples.

# Cluster T

|           | 10 | 20   | 30    | 40       | 50  | 60  | 70     |     |        |   |    |     |               |    |
|-----------|----|------|-------|----------|-----|-----|--------|-----|--------|---|----|-----|---------------|----|
| Consensus | MK | WNPI | NKKFE | LSYLPPLS | SI  | AKE | YM     | KGW | PCLEFD | G | R  | NS  | PGYYDGRYWTLWK |    |
| Nt-RbcS-t | T  | D    | T     | ED       | VD  | IQ  | I      |     |        |   | QV | YVR | E             | SM |
| Nsy-t     | T  | D    | T     | ED       | VD  | IQ  | I      |     |        |   | QV | YVR | E             | SM |
| Nto-t     | T  | D    | T     | ED       | VD  | IQ  | I      |     |        |   | QV | YVR | E             | SM |
| Stu-t     | T  | D    | T     | Q        | EE  | G   | VD     | IK  | I      |   | QV | YVH | E             | NM |
| Sly-t     | S  | D    | T     | Q        | EE  | G   | VD     | IK  | V      |   | QV | YVH | E             | KM |
| Egr-t     | T  | N    | T     | DD       | ID  | LK  | V      |     |        |   | EV | YVR | E             | RM |
| Lja-t1    | T  | N    | R     | T        | TDE | VD  | LK     | I   |        |   | EL | HIR | E             | RM |
| Cca-t     | T  | N    | T     | DD       | R   | ID  | LKN    | I   |        |   | AD | FVH | E             | KM |
| Egu-t     | QT | N    | T     | EE       | V   | ID  | IK     | I   |        |   | KL | YVY | E             | RM |
| Csi-t1    | T  | N    | A     | S        | DD  | ID  | LK     | I   |        |   | EV | YVH | E             | KM |
| Jcu-t1    | T  | N    | T     | DD       | N   | ID  | IKM    | I   |        |   | EV | HVR | E             | RM |
| Ccl-t1    | T  | N    | A     | S        | DD  | ID  | LK     | I   |        |   | EV | YVH | E             | RM |
| Gra-t     | T  | N    | T     | DD       | ID  | MK  | I      |     |        |   | EV | AVH | E             | SI |
| Gar-t     | T  | N    | T     | DD       | ID  | MK  | I      |     |        |   | EV | AVH | E             | SI |
| Atr-t     | T  | S    | T     | DE       | ID  | IS  | I      | S   |        |   | EV | YVS | Q             | RM |
| Peu-t     | T  | N    | A     | ED       | ID  | MKN | I      |     |        |   | EV | SVR | EH            | RM |
| Ptr-t     | T  | N    | A     | ED       | ID  | MK  | I      |     |        |   | EV | SVR | EH            | RM |
| Vvi-t     | T  | N    | T     | DD       | ID  | LK  | I      |     |        |   | EV | YVF | K             | QI |
| Sin-t     | T  | N    | T     | I        | EQ  | IE  | IK     | V   | I      |   | EV | YVY | E             | RM |
| Ppe-t     | V  | N    | T     | DD       | ID  | LK  | I      |     |        |   | EI | HIY | E             | TM |
| Mno-t     | T  | N    | R     | T        | P   | DD  | ID     | LKN | I      |   | ER | HVH | E             | RI |
| Fve-t     | S  | N    | T     | DD       | ID  | LK  | I      |     |        |   | EV | YVQ | E             | RM |
| Tca-t     | T  | FN   | T     | DD       | IE  | MK  | I      |     |        |   | EV | LVQ | E             | RI |
| Pmu-t     | V  | N    | T     | DD       | ID  | LK  | I      |     |        |   | EI | HVY | E             | TM |
| Pbr-t     | V  | N    | T     | DD       | ID  | LK  | I      |     |        |   | EV | YVY | E             | QM |
| Gso-t     | T  | N    | T     | DE       | ID  | LK  | I      |     |        |   | EL | CVR | E             | HM |
| Nnu-t     | T  | N    | A     | DE       | IE  | IIR | I      | I   |        |   | EV | HVH | S             | RM |
| Mtr-t     | T  | N    | T     | DD       | ID  | LK  | R      | T   |        |   | EF | CIH | A             | QM |
| Gma-t     | T  | N    | T     | DE       | ID  | LK  | I      |     |        |   | EL | CVR | E             | HM |
| Pda-t     | T  | N    | A     | AEE      | VD  | LS  | I      | A   |        |   | EV | EVH | A             | RN |
| Egi-t     | T  | N    | A     | S        | EE  | V   | VE     | LS  | I      | G | EV | EVH | T             | RI |
| Tha-t     | T  | MK   | RRY   | T        | E   | DD  | QID    | LK  | I      | A | EE | RIE | E             | RR |
| OsRbcS1   | QT | FT   | RRY   | AM       | AK  | S   | IEFIMS | V   |        |   | KE | EIH | S             | RM |

|           | 80     | 90  | 100 | 110 | 120 | 130  |     |       |       |     |   |    |                |
|-----------|--------|-----|-----|-----|-----|------|-----|-------|-------|-----|---|----|----------------|
| Consensus | LPMFGC | D   | VL  | EI  | EC  | YPNA | IRC | AFD   | Q     | QCM | F | I  | KP             |
| Nt-RbcS-t | N      | SSQ | N   | Q   | KKA | F    | L   | NVK   | V     | A   | L | Q  | AAA            |
| Nsy-t     | N      | SSQ | N   | Q   | KKA | F    | L   | NVK   | V     | A   | L | Q  | AAA            |
| Nto-t     | N      | SSQ | N   | QD  | KKA | F    | L   | NVK   | V     | A   | L | Q  | VA             |
| Stu-t     | N      | SSQ | N   | Q   | KKA | F    | L   | NVK   | A     | A   | L | Q  | AA             |
| Sly-t     | N      | SSQ | N   | Q   | KKA | F    | L   | NVK   | A     | A   | L | Q  | AP             |
| Egr-t     | N      | SSQ | H   | S   | KKA | YV   | L   | NKN   | G     | A   | I | QR | ASS            |
| Lja-t1    | N      | SSQ | N   | Q   | KRA | Y    | L   | NHRHM | S     | A   | I | Q  | AAANTTTT       |
| Cca-t     | T      | SSQ | N   | Q   | KKA | Y    | L   | NVK   | V     | A   | V | Q  | TS             |
| Egu-t     | N      | SSQ | K   | E   | KKA | Y    | L   | NIK   | A     | A   | V | Q  | NTAS           |
| Csi-t1    | N      | SSQ | I   | N   | Q   | KKA  | Y   | L     | NNQK  | G   | S | L  | Q              |
| Jcu-t1    | N      | SAQ | N   | MH  | KKA | Y    | L   | NKK   | C     | S   | I | Q  | QL             |
| Ccl-t1    | N      | SSQ | I   | N   | Q   | KKA  | Y   | L     | NNQK  | G   | S | L  | Q              |
| Gra-t     | N      | SSQ | K   | H   | KKA | Y    | L   | NKH   | A     | S   | V | H  | N              |
| Gar-t     | N      | SSQ | K   | H   | KKA | Y    | L   | NKH   | A     | S   | V | H  | N              |
| Atr-t     | A      | SSQ | R   | E   | KRT | S    | Y   | L     | NQK   | V   | A | L  | Q              |
| Peu-t     | T      | SSQ | Q   | Q   | KKA | D    | Y   | L     | NKR   | A   | A | V  | Q              |
| Ptr-t     | T      | SSQ | E   | H   | KKA | D    | Y   | L     | NKH   | G   | A | V  | Q              |
| Vvi-t     | N      | ASQ | N   | H   | KKT | Y    | L   | NEH   | G     | A   | V | Q  | TCS            |
| Sin-t     | T      | SSQ | K   | Q   | RQA | Y    | L   | NVK   | A     | A   | L | Q  | NN             |
| Ppe-t     | T      | PSL | N   | YQ  | KTA | Y    | L   | M     | N     | I   | N | G  | A              |
| Mno-t     | N      | SSQ | N   | R   | KEA | Y    | L   | NKH   | V     | A   | V | Q  | TTTTTTTAA      |
| Fve-t     | I      | PSL | N   | Q   | KKT | Y    | L   | NQN   | G     | A   | I | Q  | NIAATTTSA      |
| Tca-t     | NN     | SSQ | N   | H   | KKA | Y    | L   | SKH   | A     | S   | V | Q  | T              |
| Pmu-t     | T      | PSL | N   | YQ  | KTA | F    | L   | N     | I     | N   | G | S  | I              |
| Pbr-t     | T      | PSL | N   | QQ  | KTE | Y    | L   | M     | N     | V   | N | G  | A              |
| Gso-t     | S      | SSQ | K   | H   | RRV | Y    | L   | NQRHM | S     | A   | I | VH | DITTTT         |
| Nnu-t     | S      | SSQ | E   | H   | KKM | Y    | L   | NKR   | A     | A   | V | Q  | STASTTTNTACGCP |
| Mtr-t     | N      | SSQ | N   | N   | KKT | Y    | L   | NKRHM | A     | A   | V | H  | TTTTTN         |
| Gma-t     | A      | S   | SSQ | K   | H   | RRV  | Y   | L     | NQRHM | S   | A | I  | VH             |
| Pda-t     | T      | SAQ | Q   | G   | KKA | Y    | L   | ML    | NSKR  | C   | S | V  | H              |
| Egi-t     | T      | SAQ | Q   | D   | KKT | Y    | L   | LL    | NSKR  | C   | S | V  | Q              |
| Tha-t     | S      | SGQ | MR  | E   | RGA | Y    | L   | M     | SSK   | T   | I | S  | L              |
| OsRbcS1   | S      | AAA | R   | VE  | RRE | D    | F   | L     | I     | SSR | C | S  | VVH            |

## Cluster M

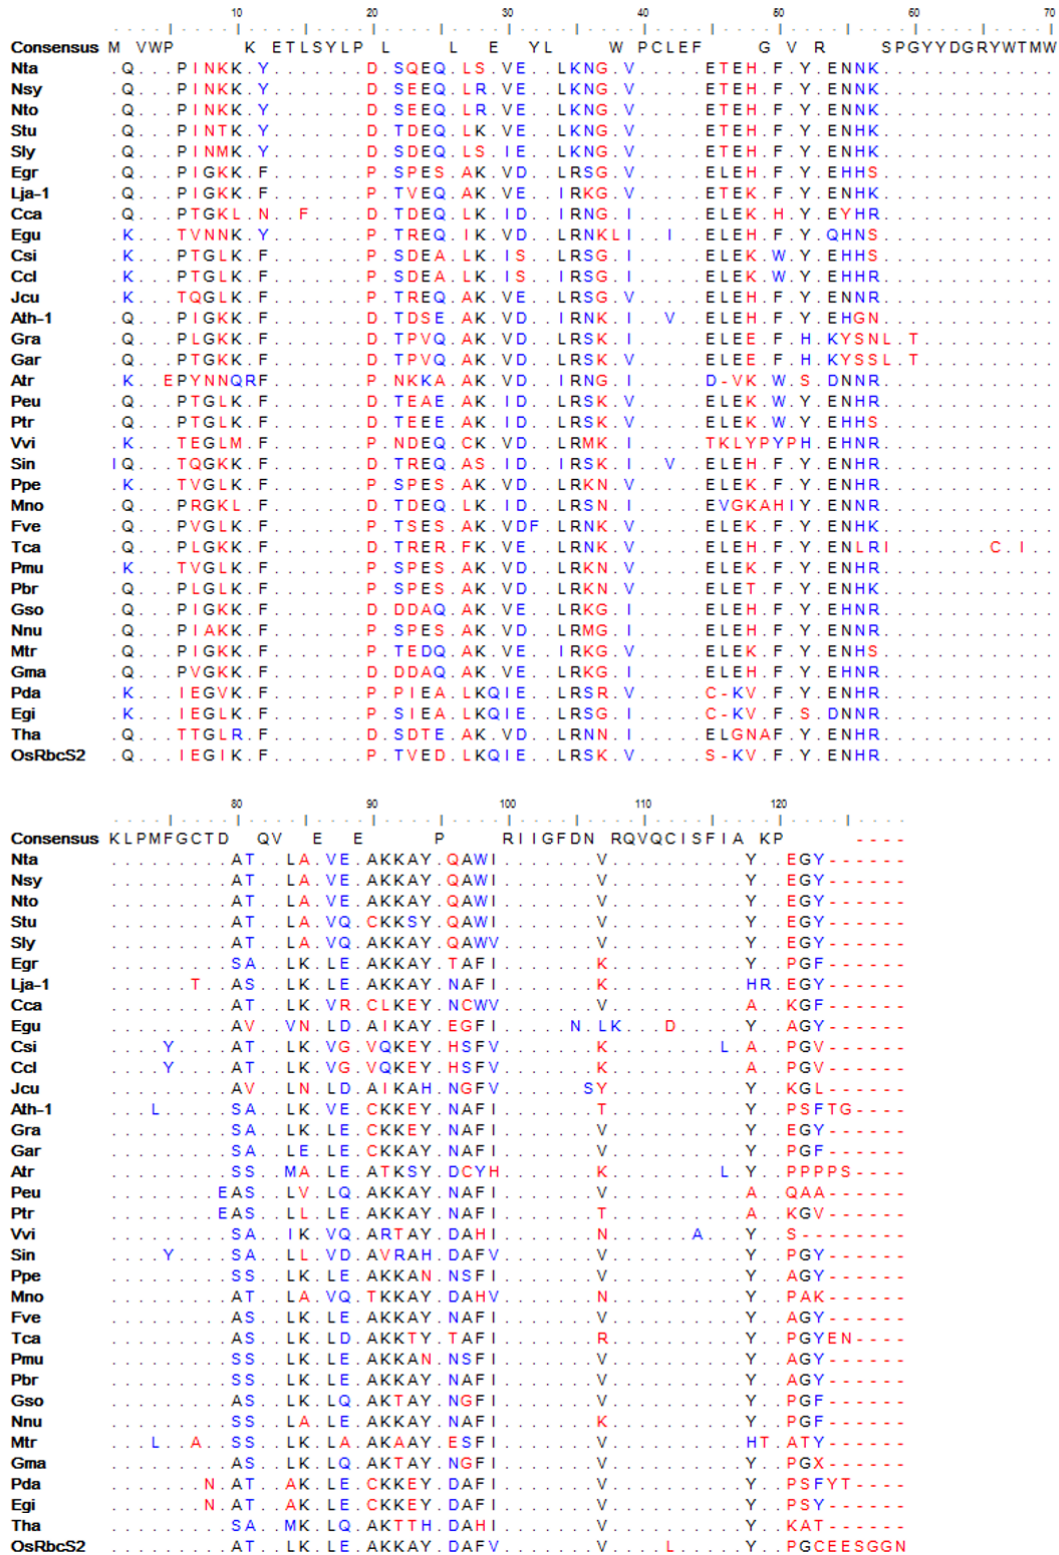

**Supplemental Figure S7.** Alignment of the RbcS amino acid sequences. Amino acid sequences of the mature proteins from clusters T and M as listed in Table S2 were separately aligned using the ClustalW Multiple alignment, and a consensus sequence was generated for positions where at least 85% of the residues are conserved. Similar residues are in blue, identical residues are in black, and different residues are in red. Residues identical to the consensus sequence are indicated with a dot.
